# Supplementary material
Source: PubMed Central journal article supplement (PMC8919321)
Supplement: sj-pdf-1-ebm-10.1177_15353702211057473.pdf [file sj-pdf-1-ebm-10.1177_15353702211057473.pdf]

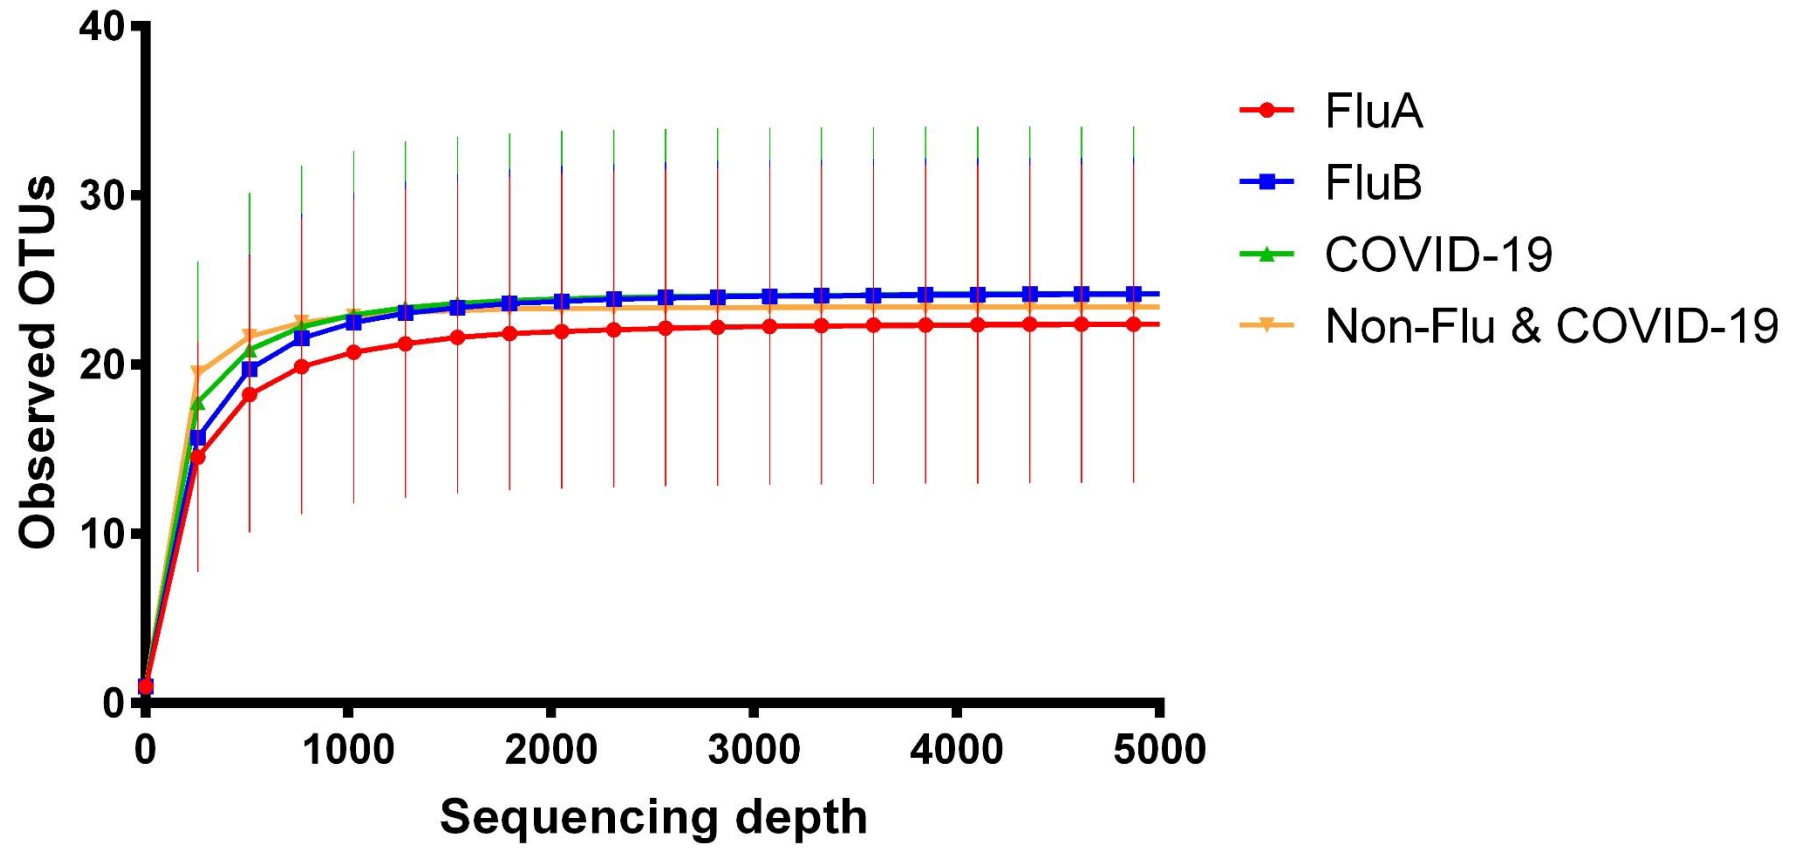

Supplementary Figure 1 The rarefaction curve of upper respiratory bacterial profile in 4 groups.

(a)

■ Influenza  
■ COVID-19  
■ Non-flu & COVID-19

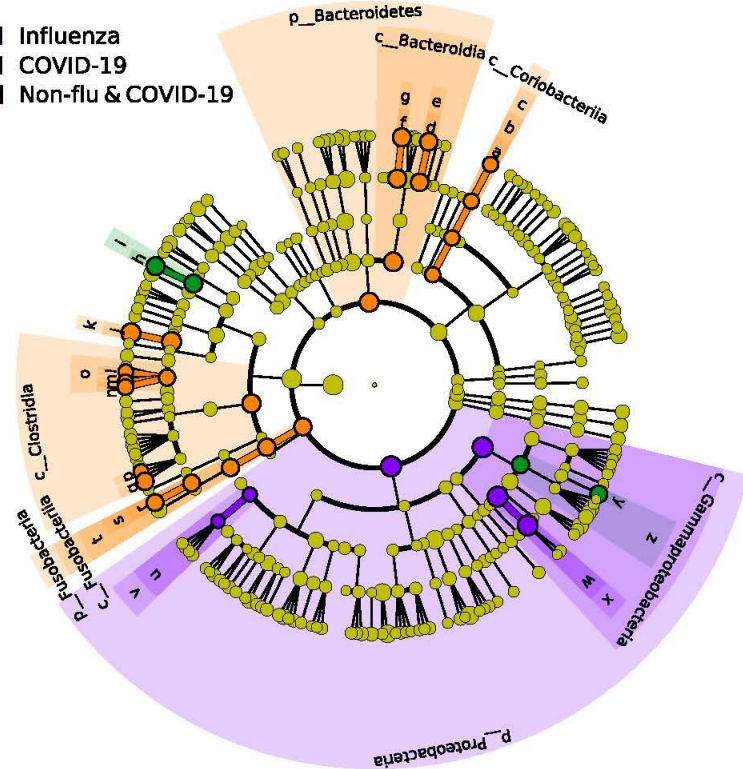

|                         |                       |                         |
|-------------------------|-----------------------|-------------------------|
| a: g_Atopobium          | j: g_Streptococcus    | s: f_Fusobacteriaceae   |
| b: f_Coriobacteriaceae  | k: f_Streptococcaceae | t: o_Fusobacteriales    |
| c: o_Coriobacteriales   | l: g_Butyrvibrio      | u: f_Caulobacteraceae   |
| d: g_Prevotella         | m: g_Moryella         | v: o_Caulobacterales    |
| e: f_Paraprevotellaceae | n: g_Oribacterium     | w: f_Enterobacteriaceae |
| f: g_Prevotella         | o: f_Lachnospiraceae  | x: o_Enterobacteriales  |
| g: f_Prevotellaceae     | p: g_Megasphaera      | y: g_Pseudomonas        |
| h: g_Staphylococcus     | q: g_Veillonella      | z: o_Pseudomonadales    |
| i: f_Staphylococcaceae  | r: g_Fusobacterium    |                         |

(b)

■ Influenza    ■ COVID-19    ■ Non-flu & COVID-19

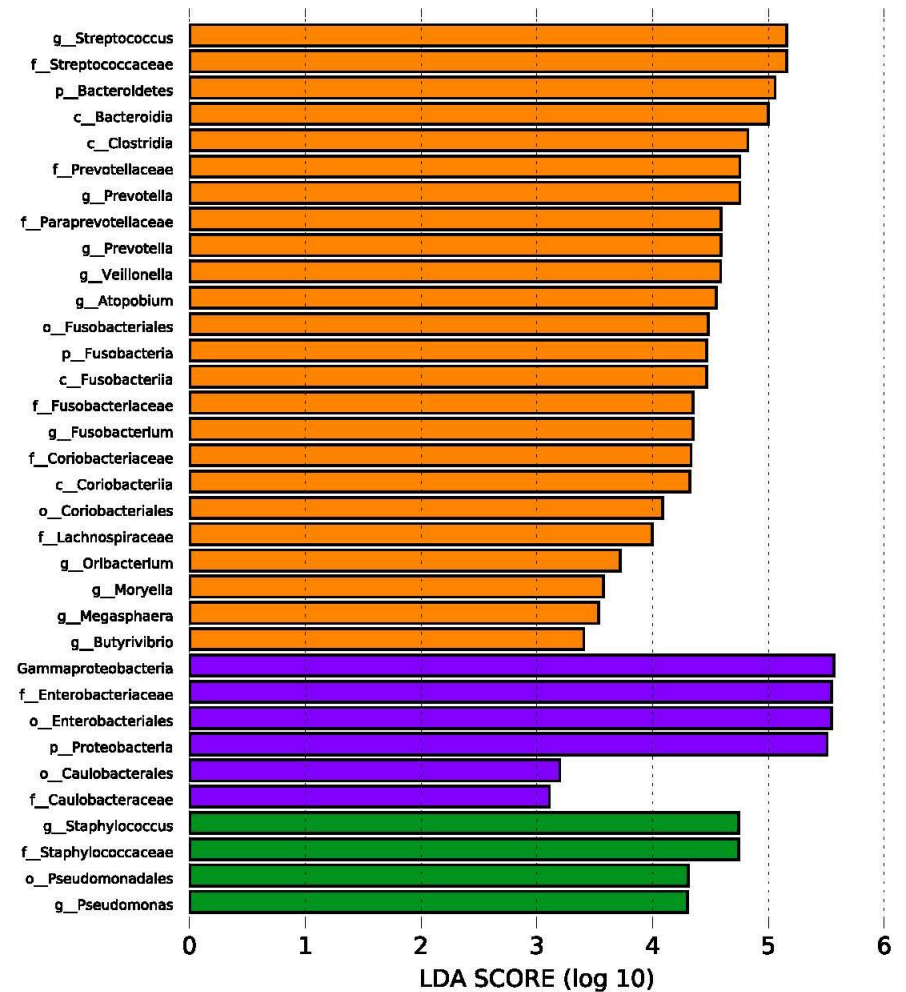

**Supplementary Figure 2** Linear discriminant analysis Effect Size (LEfSe) analysis of bacterial profiles in 3 groups. (a) A cladogram of the differentially enriched taxa (LDA scores > 4 and P<0.05). (b) The bar graph shows the LDA scores of significantly enriched taxa (influenza = purple, COVID-19 = green, and Non-Flu & COVID-19 = orange).
